# Supplementary material for: Synthesis and characterizations of cyclic octanuclear mixed-valence vanadium(iv,v) clusters with polyoxometalate counterions
Source: Royal Society of Chemistry journal article supplement (doi:10.1039/b610735d), 2006-01-01

Figure S1 Comparison between (a) the experimental powder diffraction pattern of **1**, (b) the experimental powder diffraction pattern of **2** and (c) the calculated powder diffraction pattern deduced from single crystal X-ray diffraction data of **1**.

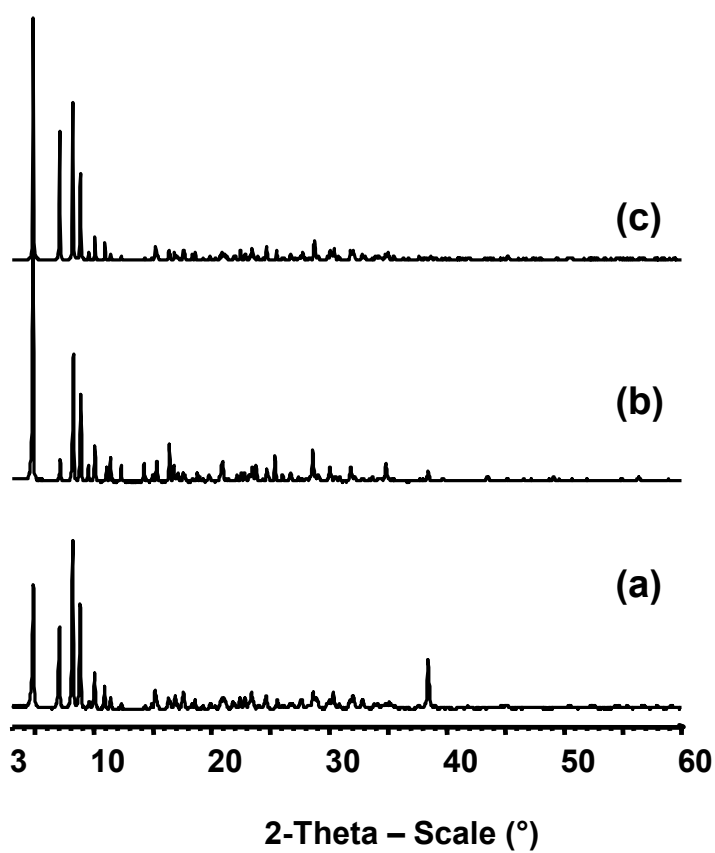

Supplement: b610735d.pdf [file b610735d.pdf]
